# Supplementary material
Source: MDPI journal article supplement (https://www.mdpi.com/2227-9040/10/3/96)
Supplement: s1 [file s1]

# **Supporting information for**

## **Porous Pb-Doped ZnO Nanobelts with Enriched Oxygen Vacancies: Preparation and Their Chemiresistive Sensing Performance**

Kai-Ge Zheng<sup>1,2</sup>, Tian-Yu Yang<sup>1,2</sup> and Zheng Guo<sup>1,2,\*</sup>

<sup>1</sup> Information Materials and Intelligent Sensing Laboratory of Anhui Province, Institutes of Physical Science and Information Technology, Anhui University, Hefei 230601, China

<sup>2</sup> Key Laboratory of Structure and Functional Regulation of Hybrid Materials (Anhui University), Ministry of Education, Hefei 230601, China

\*Correspondence should be addressed to Z. Guo.

E-mail: zhguo@ahu.edu.cn (Z. Guo)

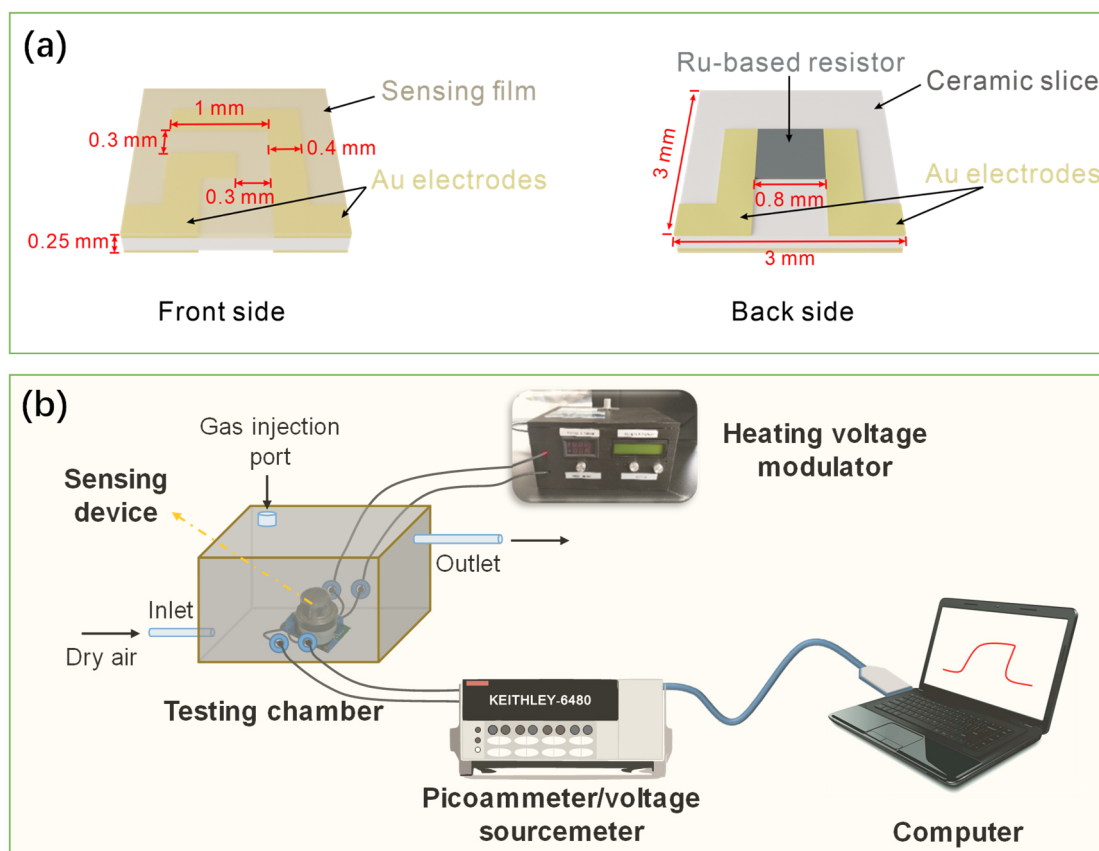

**Figure S1.** (a) Structure of the as-fabricated sensing device, (b) Schematic setup of gas-sensing measurement.

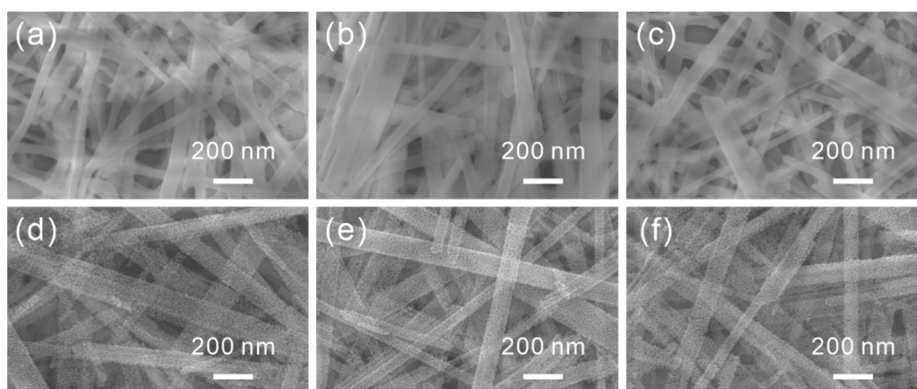

**Figure S2.** SEM images of 0.44 at% (a), 1.39 at% (b) and 2.01 at% (c) Pb<sup>2+</sup>-exchanged ZnSe precursor nanobelts, and 0.44 at% (d), 1.39 at% (e) and 2.01 at% (f) Pb-doped ZnO porous nanobelts.

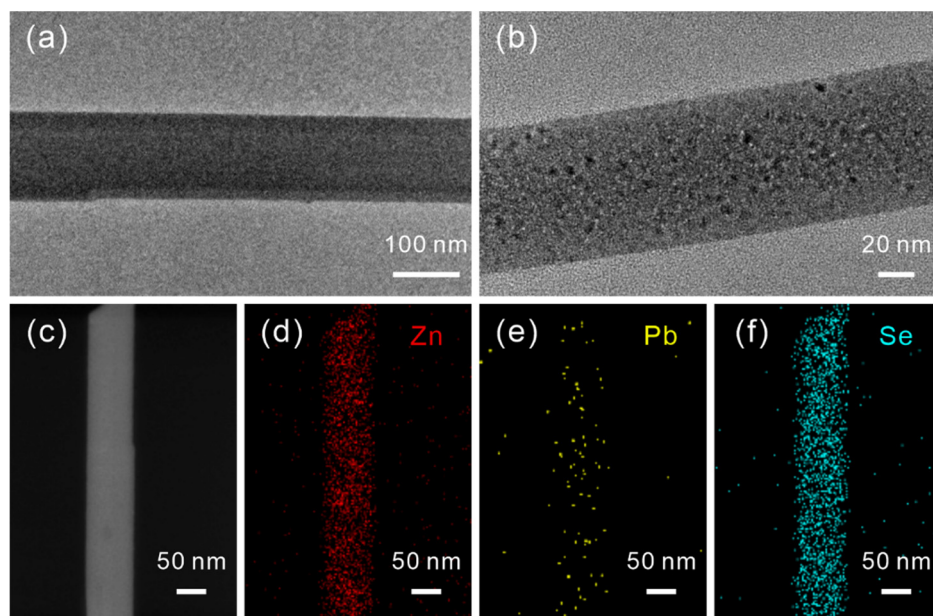

**Figure S3.** (a) TEM image of single Pb-doped precursor nanobelt, (b) its high magnified TEM, (c) its HAADF image and the corresponding elemental mapping patterns of (d) Zn, (e) Pb and (f) Se.

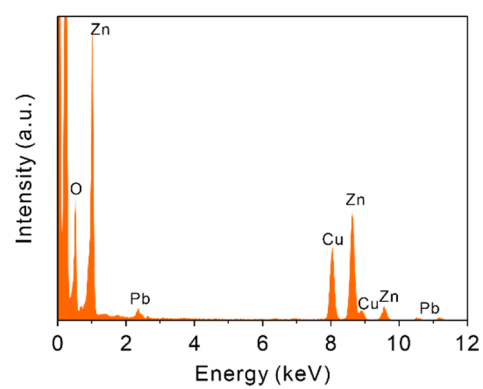

**Figure S4.** EDX spectrum of the obtained Pb-doped ZnO porous nanobelts.

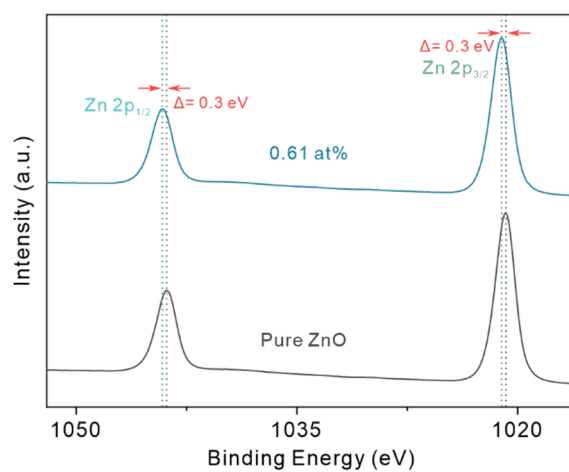

**Figure S5.** High-resolution Zn 2p XPS spectra of pure ZnO porous nanobelts and 0.61 at% Pb-doped ZnO porous nanobelts.

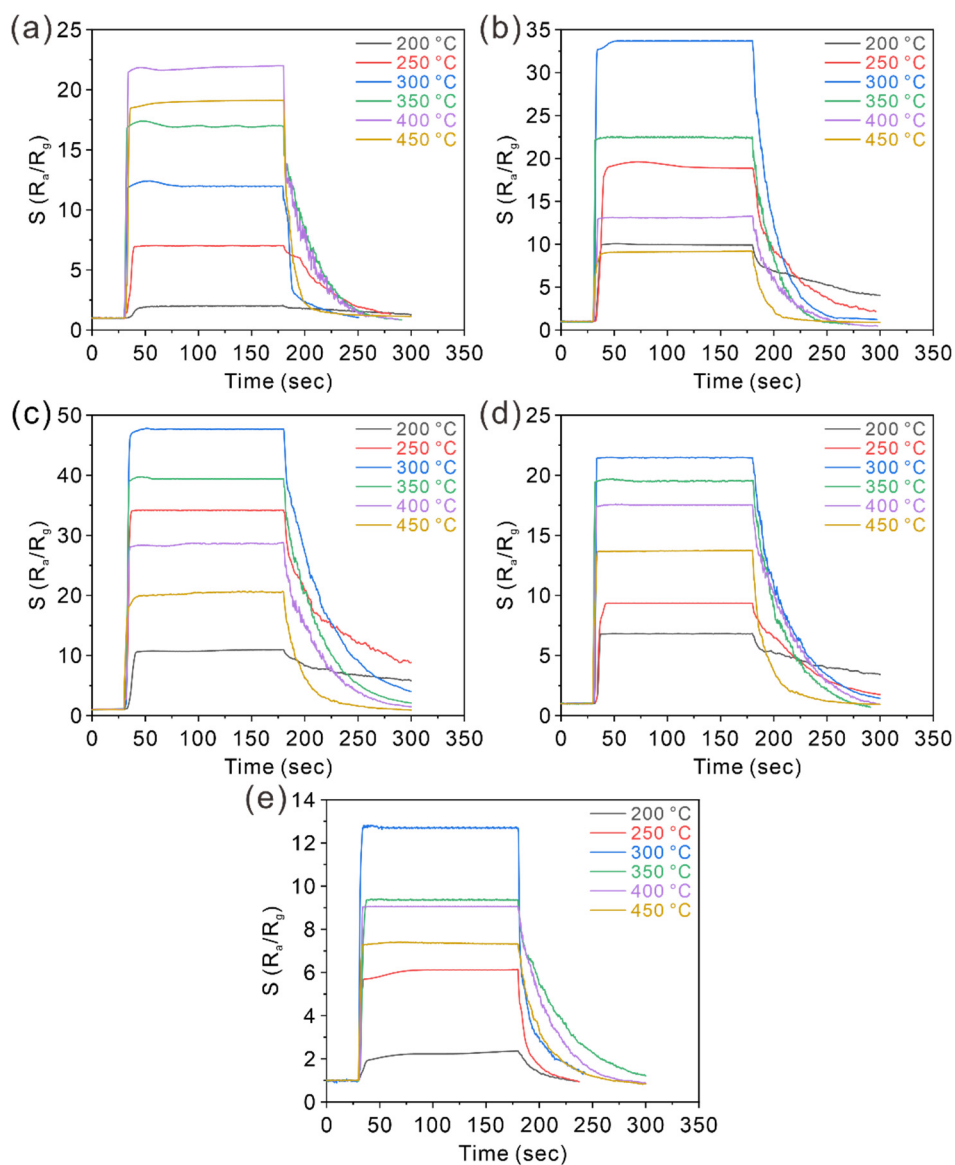

**Figure S6.** The real-time response curves of porous ZnO nanobelts doped with (a) 0 at%, (b) 0.44 at%, (c) 0.61 at%, (d) 1.39 at% and (e) 2.01 at% of Pb toward 50 ppm of n-butanol at different working temperature.

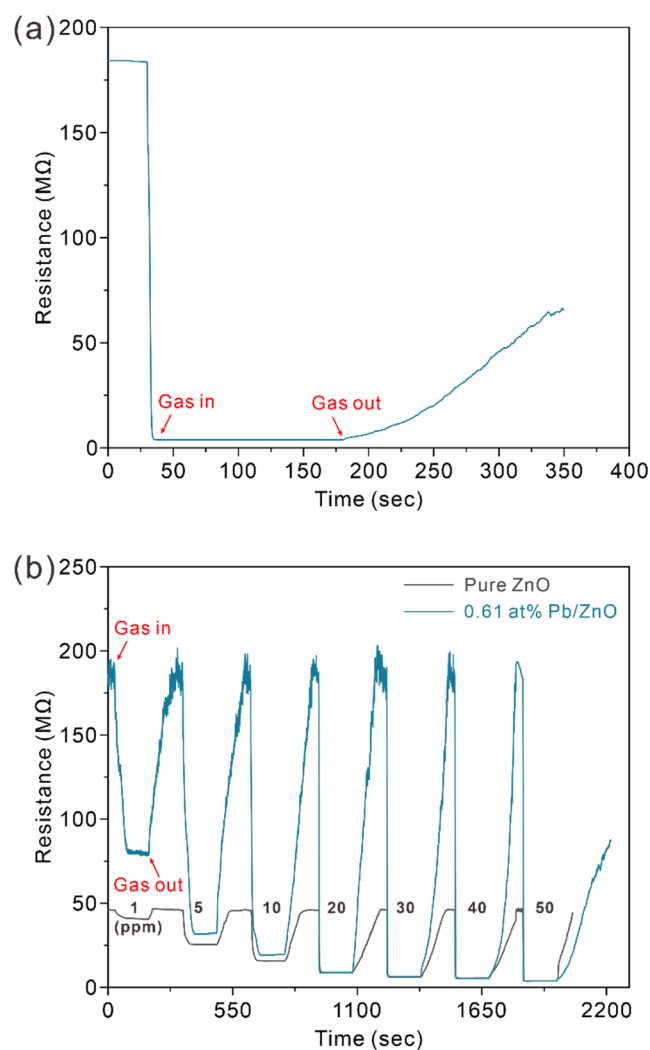

**Figure S7.** (a) The real-time resistance response curve of 0.61 at% Pb-doped ZnO porous nanobelts toward 50 ppm of n-butanol at 300 °C, (b) The real-time resistance curve of pure ZnO porous nanobelts and 0.61 at% Pb-doped ZnO porous nanobelts toward different concentrations of n-butanol at 300 °C.

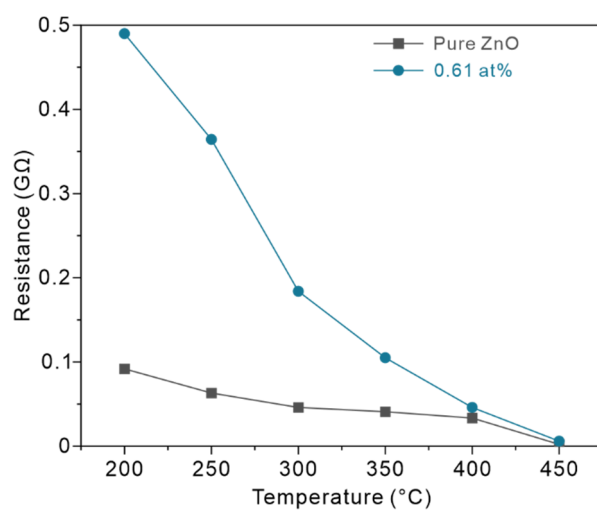

**Figure S8.** The relationship between resistance and temperature of the sensing film fabricated with pure ZnO porous nanobelts and 0.61 at% Pb-doped ZnO porous nanobelts.

**Table S1.** Structural parameters of as-synthesized samples analyzed at (100) from XRD data.

| Pb (at%) | 2 $\theta$ (deg.) | d (Å)  | Lattice parameters |         | FWHM (deg.) |
|----------|-------------------|--------|--------------------|---------|-------------|
|          |                   |        | a (Å)              | c (Å)   |             |
| 0        | 31.858            | 2.8067 | 3.24583            | 5.20234 | 0.719       |
| 0.44     | 31.837            | 2.8085 | 3.24644            | 5.20374 | 0.61        |
| 0.61     | 31.829            | 2.8091 | 3.24774            | 5.20593 | 0.68        |
| 1.39     | 31.816            | 2.8103 | 3.24811            | 5.20637 | 0.625       |
| 2.0      | 31.766            | 2.8146 | 3.25184            | 5.21353 | 0.716       |

**Table S2.** Fitting results of O 1s XPS spectrum of pure ZnO porous nanobelts and 0.61 at% Pb-doped ZnO porous nanobelts.

| Samples                    | Oxygen species  | Binding energy (eV) | Relative percentage (%) |
|----------------------------|-----------------|---------------------|-------------------------|
| ZnO                        | O <sub>ad</sub> | 531.84              | 12.47                   |
|                            | O <sub>va</sub> | 531.06              | 13.62                   |
|                            | O <sub>Zn</sub> | 530.27              | 73.91                   |
| Pb-doped ZnO<br>(0.61 at%) | O <sub>ad</sub> | 531.68              | 20.63                   |
|                            | O <sub>va</sub> | 530.66              | 30.13                   |
|                            | O <sub>Zn</sub> | 530.2               | 48.75                   |
|                            | O <sub>Pb</sub> | 530.37              | 0.49                    |

**Table S3.** Relative response of various metal oxide nanostructures toward n-butanol, A reported in the literatures and the present work.

| Sensing materials                                                             | Concentration (ppm) | Response    | Temperature (°C) | Response time (s) | Reference        |
|-------------------------------------------------------------------------------|---------------------|-------------|------------------|-------------------|------------------|
| SnO <sub>2</sub> hollow cubes                                                 | 50                  | 40          | 310              | 2.1               | [1]              |
| In <sub>2</sub> O <sub>3</sub> /ZnO nanorods                                  | 50                  | 50          | 370              | 6                 | [2]              |
| ZnO nanorod-microflower                                                       | 50                  | 38.2        | 300              | 8                 | [3]              |
| (CuO-Cu <sub>2</sub> O)/ZnO                                                   | 100                 | 3           | 350              | 8.2               | [4]              |
| In <sub>2</sub> O <sub>3</sub> nanorods                                       | 50                  | 200         | 240              | 77.5              | [5]              |
| ZrO <sub>2</sub> /ZnO nanorods                                                | 50                  | 30          | 245              | 20                | [6]              |
| ZnFe <sub>2</sub> O <sub>4</sub> /ZnO microspheres                            | 50                  | 13          | 320              | 10                | [7]              |
| Porous Co <sub>3</sub> O <sub>4</sub>                                         | 100                 | 21          | 100              | 146               | [8]              |
| Au <sub>39</sub> Rh <sub>61</sub> -urchinlike W <sub>18</sub> O <sub>49</sub> | 50                  | 10          | 260              | 2                 | [9]              |
| ZnO@TiO <sub>2</sub> nanorods                                                 | 100                 | 6.7         | 200              | 17                | [10]             |
| Sb-doped ZnFe <sub>2</sub> O <sub>4</sub> MPs                                 | 100                 | 35.5        | 250              | 4                 | [11]             |
| Au-WO <sub>3</sub>                                                            | 100                 | 14.4        | 250              | 10                | [12]             |
| In <sub>2</sub> O <sub>3</sub> @ZnS hollow spheres                            | 100                 | 8.6         | 260              | 20                | [13]             |
| NiCo <sub>2</sub> O <sub>4</sub>                                              | 100                 | 3.4         | 165              | 68                | [14]             |
| <b>Pb-doped ZnO porous nanobelts</b>                                          | <b>50</b>           | <b>47.7</b> | <b>300</b>       | <b>5</b>          | <b>This work</b> |

#### Reference:

- [1] Y. Wang, Y. Zeng, L. Wang, Z. Lou, L. Qiao, H. Tian, et al., Ultrathin nanorod-assembled SnO<sub>2</sub> hollow cubes for high sensitive n-butanol detection, *Sensors and Actuators B: Chemical*, 283(2019) 693-704.
- [2] F. Liu, G. Huang, X. Wang, X. Xie, G. Xu, G. Lu, et al., High response and selectivity of single crystalline ZnO nanorods modified by In<sub>2</sub>O<sub>3</sub> nanoparticles for n-butanol gas sensing, *Sensors and Actuators B: Chemical*, 277(2018) 144-51.
- [3] W. Yang, X. Xiao, B. Fang, H. Deng, Nanorods-assembled ZnO microflower as a powerful channel for n-butanol sensing, *Journal of Alloys and Compounds*, 860(2021) 158410.
- [4] M. Hoppe, N. Ababii, V. Postica, O. Lupan, O. Polonskyi, F. Schütt, et al., (CuO-Cu<sub>2</sub>O)/ZnO:Al heterojunctions for volatile organic compound detection, *Sensors and Actuators B: Chemical*, 255(2018) 1362-75.
- [5] R. Zhao, Q. Wei, Y. Ran, Y. Kong, D. Ma, L. Su, et al., One-dimensional In<sub>2</sub>O<sub>3</sub> nanorods as sensing material for ppb-level n-butanol detection, *Nanotechnology*, 32(2021) 375501.
- [6] W. Li, Y. Ren, Y. Guo, ZrO<sub>2</sub>/ZnO nanocomposite materials for chemiresistive butanol sensors, *Sensors and Actuators B: Chemical*, 308(2020) 127658.

- [7] S. Wang, X. Gao, J. Yang, Z. Zhu, H. Zhang, Y. Wang, Synthesis and gas sensor application of  $\text{ZnFe}_2\text{O}_4\text{-ZnO}$  composite hollow microspheres, *RSC Adv*, 4(2014) 57967-74.
- [8] M. Wang, Z. Shen, X. Zhao, F. Duanmu, H. Yu, H. Ji, Rational shape control of porous  $\text{Co}_3\text{O}_4$  assemblies derived from MOF and their structural effects on n-butanol sensing, *J Hazard Mater*, 371(2019) 352-61.
- [9] J. Bai, Y. Li, Y. Liu, H. Wang, F. Liu, F. Liu, et al., Au<sub>39</sub>Rh<sub>61</sub> Alloy Nanocrystal-Decorated  $\text{W}_{18}\text{O}_{49}$  for Enhanced Detection of n-Butanol, *ACS Sens*, 4(2019) 2662-70.
- [10] Y. Xu, L. Zheng, C. Yang, W. Zheng, X. Liu, J. Zhang, Chemiresistive sensors based on core-shell  $\text{ZnO@TiO}_2$  nanorods designed by atomic layer deposition for n-butanol detection, *Sensors and Actuators B: Chemical*, 310(2020) 127846.
- [11] L. Lv, P. Cheng, Y. Wang, L. Xu, B. Zhang, C. Lv, et al., Sb-doped three-dimensional  $\text{ZnFe}_2\text{O}_4$  macroporous spheres for N-butanol chemiresistive gas sensors, *Sensors and Actuators B: Chemical*, 320(2020) 128384.
- [12] Y. Wang, B. Zhang, J. Liu, Q. Yang, X. Cui, Y. Gao, et al., Au-loaded mesoporous  $\text{WO}_3$ : Preparation and n-butanol sensing performances, *Sensors and Actuators B: Chemical*, 236(2016) 67-76.
- [13] P. He, H. Fu, X. Yang, S. Xiong, D. Han, X. An, Variable gas sensing performance towards different volatile organic compounds caused by integration types of ZnS on  $\text{In}_2\text{O}_3$  hollow spheres, *Sensors and Actuators B: Chemical*, 345(2021) 130316.
- [14] F. Dang, Y. Wang, J. Gao, L. Xu, P. Cheng, L. Lv, et al., Hierarchical flower-like  $\text{NiCo}_2\text{O}_4$  applied in n-butanol detection at low temperature, *Sensors and Actuators B: Chemical*, 320(2020) 128577.
